# Supplementary material for: Wnt5a and Wnt11 are essential for second heart field progenitor development
Source: Oxford University Press journal article supplement (doi:10.1242/dev.069377), 2012-05-08
Supplement: dev069377tables1.pdf [file dev069377tables1.pdf]

**Table S1. PCR primers**

| <b>Gene</b>         | <b>Forward</b>           | <b>Reverse</b>               |
|---------------------|--------------------------|------------------------------|
| <i>Fik1</i>         | GTGGCTTCCTGATGGCAGAA     | TGTTATCATAACCTCGGCTAAAAAGTAA |
| <i>Tbx18</i>        | TGCCGGTGGACAACAAGAGATACA | ATATGGCCTTGGTCATCCAGCTCA     |
| <i>Tcf21</i>        | TCGTTTCCGTTTCAGCGTCTCTCT | TTTCAGGGAGTCACAGTCCAGCAT     |
| <i>Tbx5</i>         | ACTGTGTTTGTGCGCTCTCTCTCT | AGACTTCCACGTTCTCAGCCACAT     |
| <i>Pecam1</i>       | ATTCCTCAGGCTCGGGTCTT     | CCATGCACCTTCACCTCGTA         |
| <i>Sm22a</i>        | TCTAATGGCTTTGGGCAGTTTGGC | TTTGAAGGCCAATGACGTGCTTCC     |
| <i>Nkx2.5 (new)</i> | ACAAAGCCGAGACGGATGG      | CTGTGCTTGCACCTTGTAGC         |
| <i>SMA/Acta2</i>    | ATTGTGCTGGACTCTGGAGATGGT | TGATGTCACGGACAATCTCACGCT     |
| <i>Mlc2v</i>        | CCAGATGTTTCGCAGCCTTTC    | TCAGGGCTCAGTCCTTCTCTTC       |
| <i>Mlc2a</i>        | AGGCACAACGTGGCTCTTCT     | CCCATCCCTGTTCTGGTCAA         |
| <i>cTnl</i>         | AGACTGGCGCAAGAATATCGA    | GACGTCCTTCAGAGCACAGTGT       |
| <i>Isl1</i>         | TAAGCATGCCCTGTAGCTGGTT   | GATGGATCTCAAAAAAATGGTAAAGAG  |
| <i>Hand1</i>        | GAAGGGTTAAACCCGGTCTTTG   | CAAGGCTGGAGATGACACGAA        |
| <i>Hand2</i>        | CCACCAGATACATCGCCTACCT   | CTTTCACGTCGGTCTTCTTGATC      |
| <i>Mesp1</i>        | ATCCCAGGAAAGGCAGGAAATGGA | TGTGCTCAGACAGGGTGACAATCA     |
| <i>Gapdh</i>        | AGTTGTCTCCTGCGACTTCA     | CCAGGAAATGAGCTTGACAAAGTT     |
